# Supplementary material
Source: PubMed Central journal article supplement (PMC4413325)
Supplement: pnas.201420308SI.pdf [file pnas.201420308SI.pdf]

# Supporting Information

Becker et al. 10.1073/pnas.1420308112

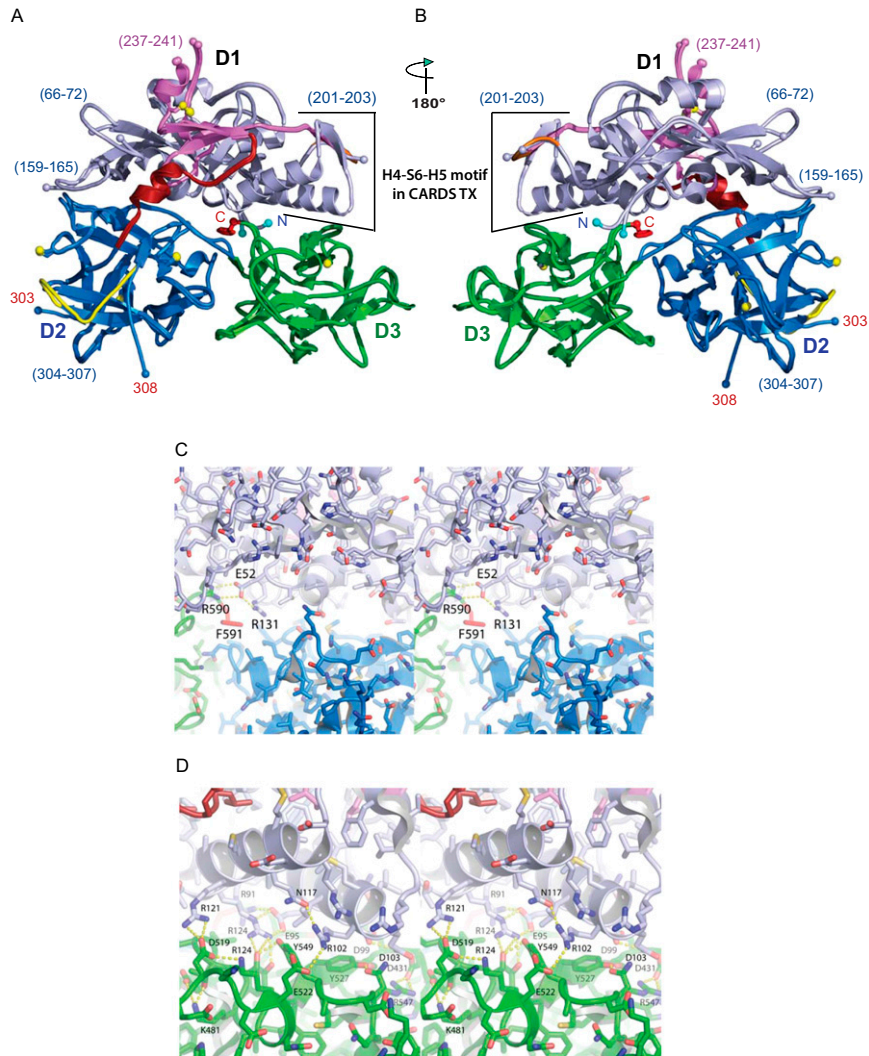

**Fig. S1.** “Native” and “nicked” CARD5 TX structures and the interface between D1 and D2+D3. The mART domain (residues 1–205) is light blue, the steric block of the NAD<sup>+</sup>-binding site (residues 206–256) is violet, the linker connecting D1 to D2+D3 (residues 257–272) is dark red, D2 (residues 273–439) is dark blue, D3 (residues 440–591) is green, the loop in D2 containing the site of cleavage in limited trypsinolysis experiments (residues 303–314) is yellow, the sulfur atoms of Cys residues are yellow spheres, and the C-terminal residue F591 is bright red. (A) Superposition of native and nicked CARD5 TX structures (rmsd 0.33 Å for 469 C $\alpha$  pairs). Residues 66–72, 159–165, and 201–203 in D1 of the native structure are disordered. Residues 304–307 in the nicked CARD5 TX structure are absent owing to trypsinolysis after K303 and K307. (B) Native CARD5 TX structure superimposed on the nicked CARD5 TX structure. The view is 180° around the vertical axis relative to A. The helix-strand-helix (H4-S6-H5) of the D1 mART domain that is unique to CARD5 TX and interacts with D3 is indicated. (C) Divergent stereo pair showing the interface between D1 and D2. The interactions are tenuous, suggesting that disruption of the interactions between D1 and D3 may be sufficient to expose the catalytic residues and ARTT target recognition motif. (D) Divergent stereo pair showing the interface between D1 and D3. The interactions are primarily polar, and there are many interdomain hydrogen bonds and ion pairs. The two helices in the image are H4 and H5 from the H4-S6-H5 motif unique to CARD5 TX.

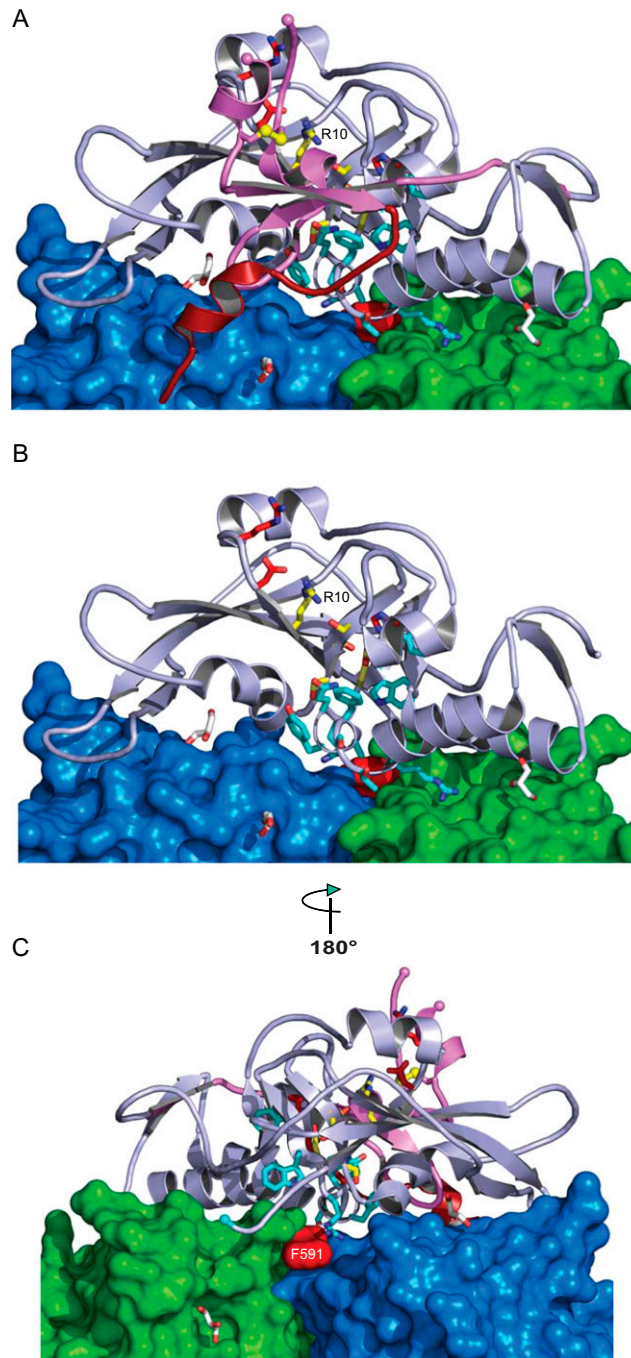

**Fig. S2.** Steric blocks of CARDS TX mART activity. The color code is the same as in Fig. S1. Active site residues are shown as sticks in the color scheme presented in the sequence alignment in Fig. 3A. Three glycerol molecules from the cryoprotectant are free-floating white and red sticks. (A) The steric block of the NAD<sup>+</sup>-binding pocket consisting of residues 205–256 (violet). The flat surface of D2/D3 occludes residues of the ARTT motif involved in target protein recognition. (B) The steric block of the NAD<sup>+</sup>-binding pocket and the linker connecting D1 to D2/D3 have been removed, permitting access to the NAD<sup>+</sup>-binding pocket and residues of the ARTT target recognition motif (cyan). (C) F591 interacts with residues of the ARTT motif and active site.

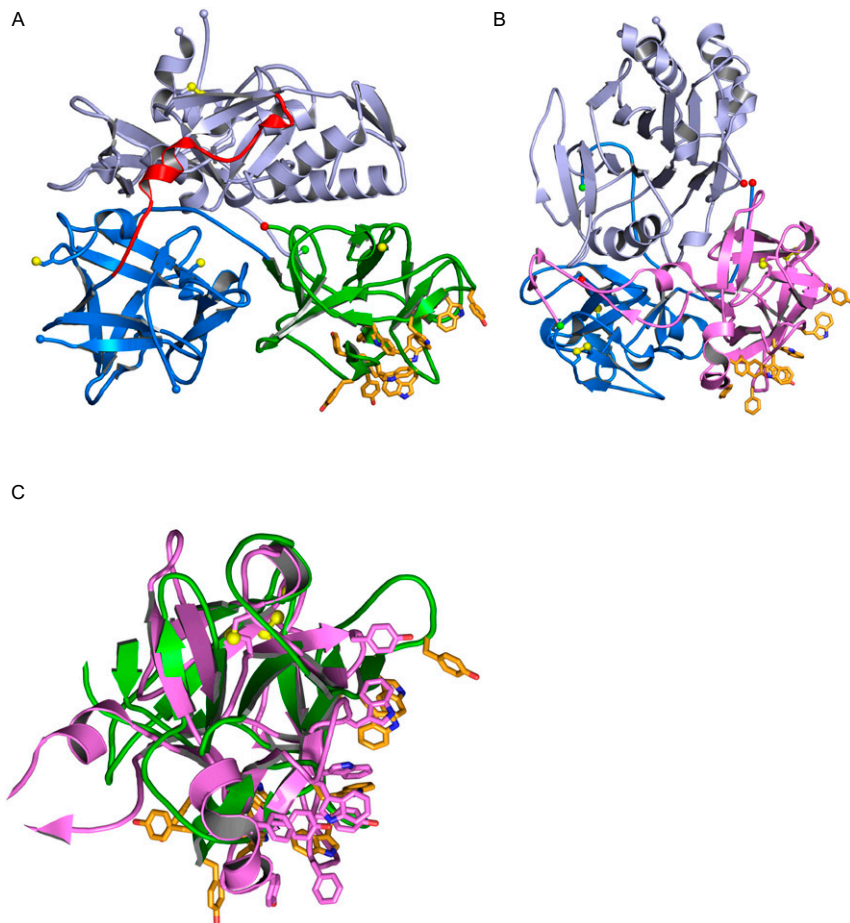

**Fig. 53.** Comparison of CARD5 TX to CDT. The catalytic mART domain of CARD5 TX and the nuclease domain of CDT are in light blue. (A) CARD5 TX. Residues comprising the aromatic patch in D3 are shown as orange sticks. (B) CDT from *H. ducreyi* (PDB ID code 1SR4). Residues comprising the aromatic patch in CdtA are shown as orange sticks. The relative orientations of the  $\beta$ -trefoils in CARD5 TX (dark blue and green) and CDTa (violet) and CDTc (blue) are similar. (C) CARD5 TX D3 superimposed on CdtA. Residues of the aromatic patch in CdtA are violet sticks.



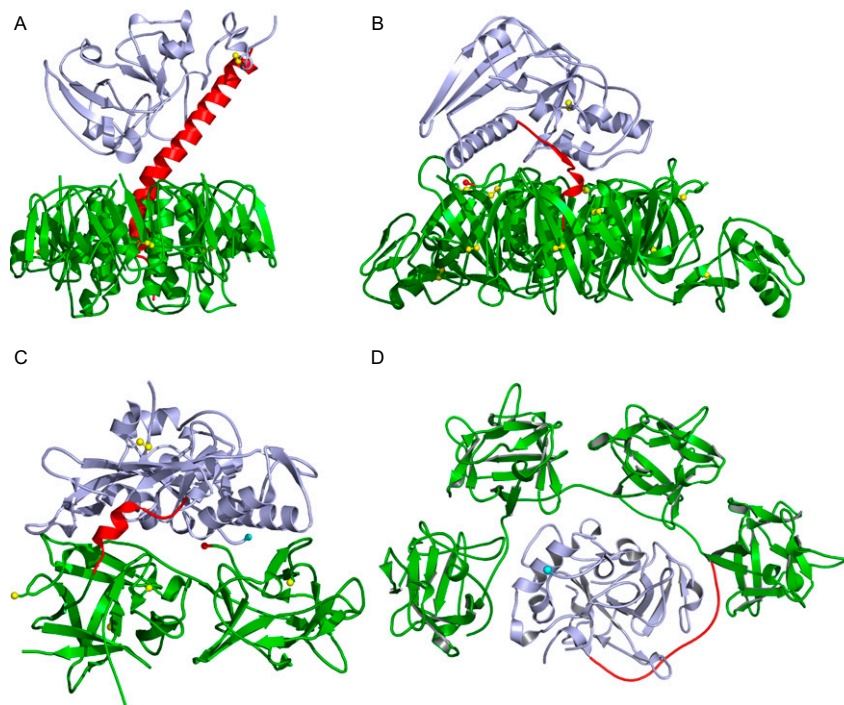

**Fig. S5.** CARD5 TX architecture differs from other bacterial ADP-ribosylating toxins. Here mART domains are light blue, cell surface binding domains are green, linkers between mART and cell surface binding domains are red, and Cys 5 $\gamma$  atoms are yellow spheres. (A) Cholera toxin (PDB ID code 1xtc). (B) Pertussis toxin (PDB ID code 1prt). (C) CARD5 TX (this study). (D) Mosquitocidal toxin (PDB ID code 2vse). The only toxins with both mART and  $\beta$ -trefoil domains are CARD5 TX and mosquitocidal toxin, although the number and arrangement of  $\beta$ -trefoil domains relative to the mART domains is completely different in the two toxins.

Table S1. X-ray diffraction data and protein structure refinement statistics for CARDS TX in two crystal forms

|                                    | Native, nicked high-resolution | Native, unnicked                          | Native, nicked      | Xenon derivative    |
|------------------------------------|--------------------------------|-------------------------------------------|---------------------|---------------------|
| Data collection                    |                                |                                           |                     | Phasing             |
| PDB ID code                        | 4TLV                           | 4TLW                                      |                     |                     |
| Space group                        | C2                             | R3 [H3]*                                  | C2                  | C2                  |
| Cell dimensions                    |                                |                                           |                     |                     |
| <i>a</i> , <i>b</i> , <i>c</i> , Å | 191.7, 107.4, 222.3            | 107.3, 107.3, 107.3 [178.4, 178.4, 89.5]* | 191.4, 107.4, 222.1 | 191.4, 107.2, 221.3 |
| $\alpha$ , $\beta$ , $\gamma$ , °  | 90, 90.6, 90                   | 112.6, 112.6, 112.6 [90, 90, 120]*        | 90, 90.6, 90        | 90, 90.4, 90        |
| Wavelength, Å                      | 0.9795                         | 0.97903                                   | 1.5418              | 1.5418              |
| Resolution, Å                      | 50–1.9                         | 50–2.55                                   | 30–2.2              | 30–2.7              |
| $R_{\text{sym}}^{\dagger}$         | 0.073 (0.577)                  | 0.059 (0.522)                             | 0.077 (0.443)       | 0.099 (0.466)       |
| $I/\sigma$                         | 15.5 (2.3)                     | 20.5 (2.1)                                | 13.1 (2.3)          | 10.2 (2.1)          |
| Completeness, %                    | 99.7 (100)                     | 99.1 (93.2)                               | 99.5 (99.7)         | 95.0 (92.1)         |
| Redundancy                         | 3.1 (3.2)                      | 4.5 (4.1)                                 | 2.9 (2.8)           | 2.9 (2.8)           |
| SIRAS phasing                      |                                |                                           |                     |                     |
| Resolution, Å                      | —                              | —                                         |                     | 30.0–4.0 Å          |
| $R_{\text{cullis}}$ (iso/ano)      | —                              | —                                         |                     | 0.92/0.86           |
| Phasing power (iso/ano)            | —                              | —                                         |                     | 0.66/0.82           |
| Figure of merit                    | —                              | —                                         |                     | 0.39                |
| No. of xenon sites                 | —                              | —                                         |                     | 27                  |
| Refinement                         |                                |                                           |                     |                     |
| Resolution, Å                      | 38.87–1.9                      | 44.61–2.55                                |                     |                     |
| No. of reflections                 | 350,157                        | 34,124                                    |                     |                     |
| $R_{\text{work}}/R_{\text{free}}$  | 0.186/0.215                    | 0.198/0.244                               |                     |                     |
| No of atoms                        |                                |                                           |                     |                     |
| Protein                            | 28,393                         | 4,632                                     |                     |                     |
| Ligand                             | 203                            | —                                         |                     |                     |
| Solvent                            | 1,808                          | 25                                        |                     |                     |
| <i>B</i> factors, Å <sup>2</sup>   |                                |                                           |                     |                     |
| Protein                            | 27.1                           | 77.8                                      |                     |                     |
| Ligand                             | 29.1                           | —                                         |                     |                     |
| Solvent                            | 27.8                           | 59.9                                      |                     |                     |
| rmsd                               |                                |                                           |                     |                     |
| Bond length, Å                     | 0.010                          | 0.008                                     |                     |                     |
| Bond angle, °                      | 1.099                          | 1.102                                     |                     |                     |

\*Unit cell parameters for the R3 crystal form on the hexagonal setting are in square brackets.

<sup>†</sup>Values in parentheses are for the highest-resolution shell.
